# Supplementary material
Source: Springer Nature journal article supplement (https://www.springermedizin.de/resource/supplementary/12874_2002_34_MOESM2_ESM.pdf/9433682)

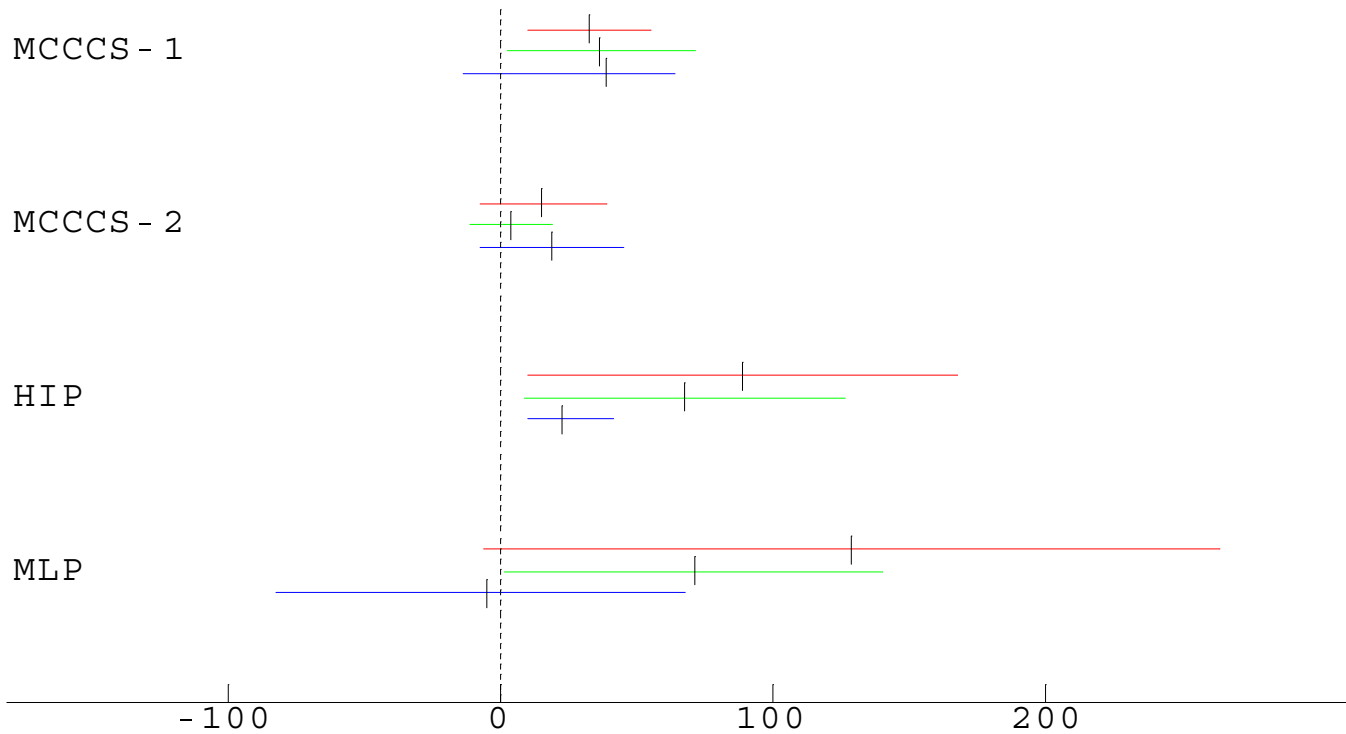

— PSE all subjects

— PSE screened subjects

— randomized group comparison

Supplement: MOESM2 [file 9433682]
